# Supplementary material for: Tumour-activated neutrophils in gastric cancer foster immune suppression and disease progression through GM-CSF-PD-L1 pathway
Source: PubMed Central journal article supplement — Gut. 2017 Mar 8;66(11):1900–11. doi: 10.1136/gutjnl-2016-313075 (PMC5739867; doi:10.1136/gutjnl-2016-313075), 2017-03-08

Supplementary Figure 1. Neutrophil percentage and its potential correlations with clinical parameters. Neutrophil percentage in CD45<sup>+</sup> leukocytes was analyzed for correlations with clinical pathological parameters. \*p<0.05, \*\*p<0.01, n.s p>0.05 for groups connected by horizontal lines. Each dot represents one patient. CEA, carcinoembryonic antigen; *H.pylori* Ab, *Helicobacter pylori* antibody.

Supplementary Figure 2. Tumour environment sustains neutrophil survival. (A and B) Detection of deoxyuridine triphosphate nucleotides (dUTP)<sup>-</sup> viable non-apoptotic neutrophils exposed to 50% TTCS and 50% NTCS from autologous GC patients (A); or neutrophils to exposed to 20%, 40% or 80% TTCS from GC patients for 16 h (B). (C) Expression of HLA-DR on neutrophils exposed to 50% TTCS and 50% NTCS from autologous GC patients (3 pairs of TTCS and NTCS from 3 independent GC patients) for 12 h. black, isotype control. (D) Tumour-infiltrating PD-L1<sup>+</sup>CD54<sup>+</sup> neutrophil percentage in neutrophils among TNM stages was compared. \*\*p<0.01 for groups connected by horizontal lines.

Supplementary Figure 3. Tumour-infiltrating neutrophils interact with T cells in GC tumours. (A) Representative analysis of CD15<sup>+</sup> (green) neutrophil and CD3<sup>+</sup> (red) T cell interactions in tumour tissues of GC patients by immunofluorescence. Scale bars: 20 microns. (B) CFSE-labelled peripheral CD3<sup>+</sup> T cells of patients with GC were co-cultured for 5 days with autologous neutrophils from non-tumour or tumour tissues with or without anti-PD-L1 antibody. Representative data and statistical analysis of T cell proliferation were shown (n=5). (C) Wright staining of sorted tumour-infiltrating neutrophils was shown. (D) CFSE-labelled peripheral CD3<sup>+</sup> T cells of donors were co-cultured for 5 days with TTCS-conditioned allogeneic blood neutrophils with or without PD-L1 neutralizing antibody, nor-NOHA, or 1400W. Representative data and statistical analysis of T cell proliferation and IFN- $\gamma$  production were shown (n=5). \*p<0.05, \*\*p<0.01 for groups connected by horizontal lines.

Supplementary Figure 4. Tumour-conditioned neutrophils suppress CD4<sup>+</sup> and CD8<sup>+</sup> T cell immunity through PD-L1. (A and B) CFSE-labelled peripheral CD4<sup>+</sup> T cells of donors were co-cultured for 5 days with TTCS-, or NTCS-conditioned autologous (A) or allogeneic (B) blood neutrophils with or without anti-PD-L1 antibody. (C and D) CFSE-labelled peripheral CD8<sup>+</sup> T cells of donors were co-cultured for 5 days with TTCS-, or NTCS-conditioned autologous (C) or allogeneic (D) blood neutrophils with or without anti-PD-L1 antibody. Representative data and statistical analysis of T cell proliferation and IFN- $\gamma$  production were shown (n=5). \*p<0.05, \*\*p<0.01 for groups connected by horizontal lines.

Supplementary Figure 5. Expression of PD-L1 on neutrophils after stimulation. (A) Clustering of microarray data for the expression of 50 pro-inflammatory cytokine genes in human tumour tissues from 10 GC patients. (B) Expression of PD-L1 on neutrophils exposed to M-CSF, G-CSF, IFN- $\gamma$ , TGF- $\beta$ , IL-1 $\beta$ , IL-6, IL-17A, IL-23, IL-22, IL-10 (100 ng/ml) for 12 h. black, isotype control. (C) Expression of PD-L1 on neutrophils exposed to 50% TTCS with or without BAY 11-7082 (an I $\kappa$ B $\alpha$  inhibitor), SP600125 (a JNK inhibitor), SB203580 (a MAPK inhibitor), or Wortmannin (a PI3K inhibitor) for 12 h. black, isotype control. (D) Expression of GM-CSF receptor (GM-CSFR) on tumour-infiltrating neutrophils. black, isotype control. (E) Representative analysis of GM-CSF-expressing (green) EpCam<sup>+</sup> tumour cells (red) in tumour tissues of GC patients by immunofluorescence. Scale bars: 20 microns. (F) The correlations between GM-CSF and neutrophils in human tumours were analyzed. Results are expressed as percentage of neutrophils in CD45<sup>+</sup> cells or the number of neutrophils per million total cells and GM-CSF concentration in tumour tissues.

Supplementary Figure 6. Blockade of neutrophil-associated PD-L1 on T cell immunity inhibits tumour growth and GC progression *in vivo*. (A and B) The expression (A) and the production (B) of anti-tumour molecules perforin and granzyme B in tumours of mice injected with T cells in

combination with TTCS-conditioned neutrophils (TCN), or TCN pre-treated with an anti-PD-L1 antibody or a control IgG on day 24 after tumour cell injection were compared. \* $p < 0.05$ , \*\* $p < 0.01$  for groups connected by horizontal lines.

Supplementary Figure 7. Tumour-activated neutrophils suppress T cell immunity through PD-L1-PD-1 interaction. (A and B) CFSE-labelled FACS-sorted peripheral PD-1<sup>+</sup> T cells of donors were co-cultured for 5 days with TTCS-, or NTCS-conditioned autologous (A) or allogeneic (B) blood neutrophils with or without anti-PD-L1 antibody. Representative data and statistical analysis of T cell proliferation and IFN- $\gamma$  production were shown (n=3). (C) PD-L1 expression on tumour-infiltrating neutrophils among TNM stages was compared. MFI: mean fluorescence intensity. \*\* $p < 0.01$  for groups connected by horizontal lines.

## Supplementary Figures

Supplementary Figure 1

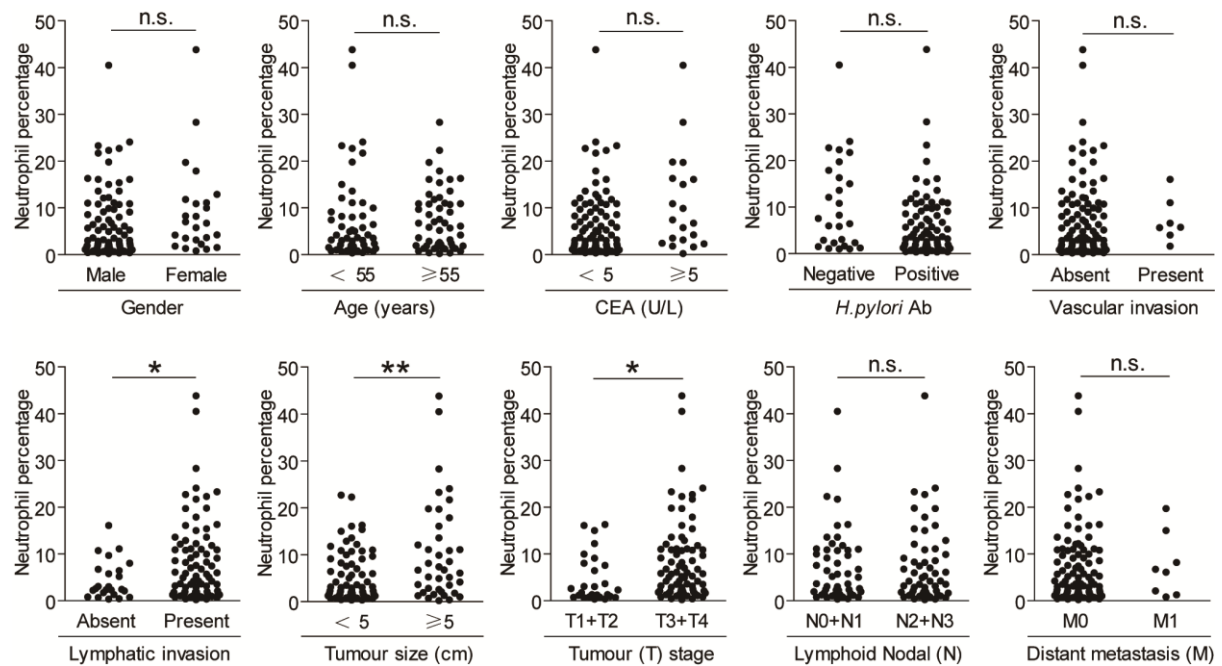

Supplementary Figure 2

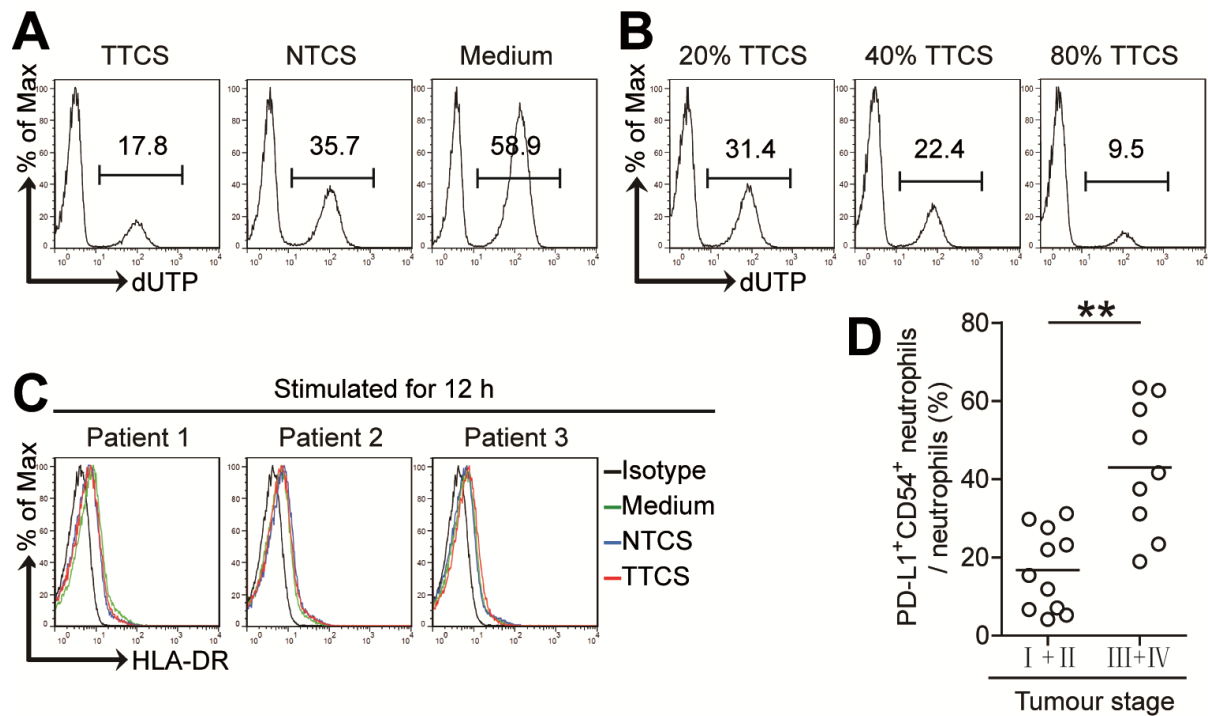

Supplementary Figure 3

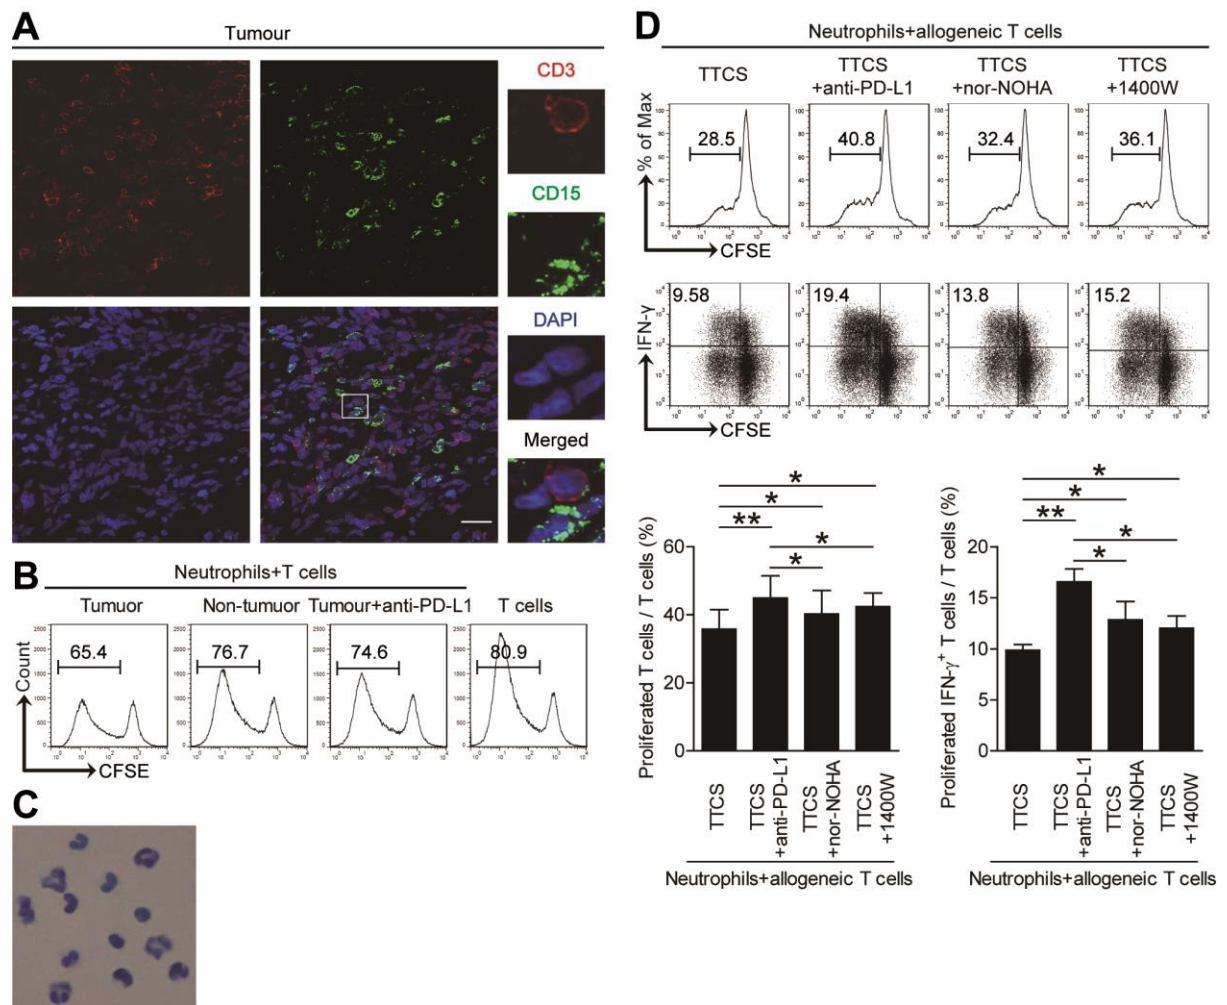

Supplementary Figure 4

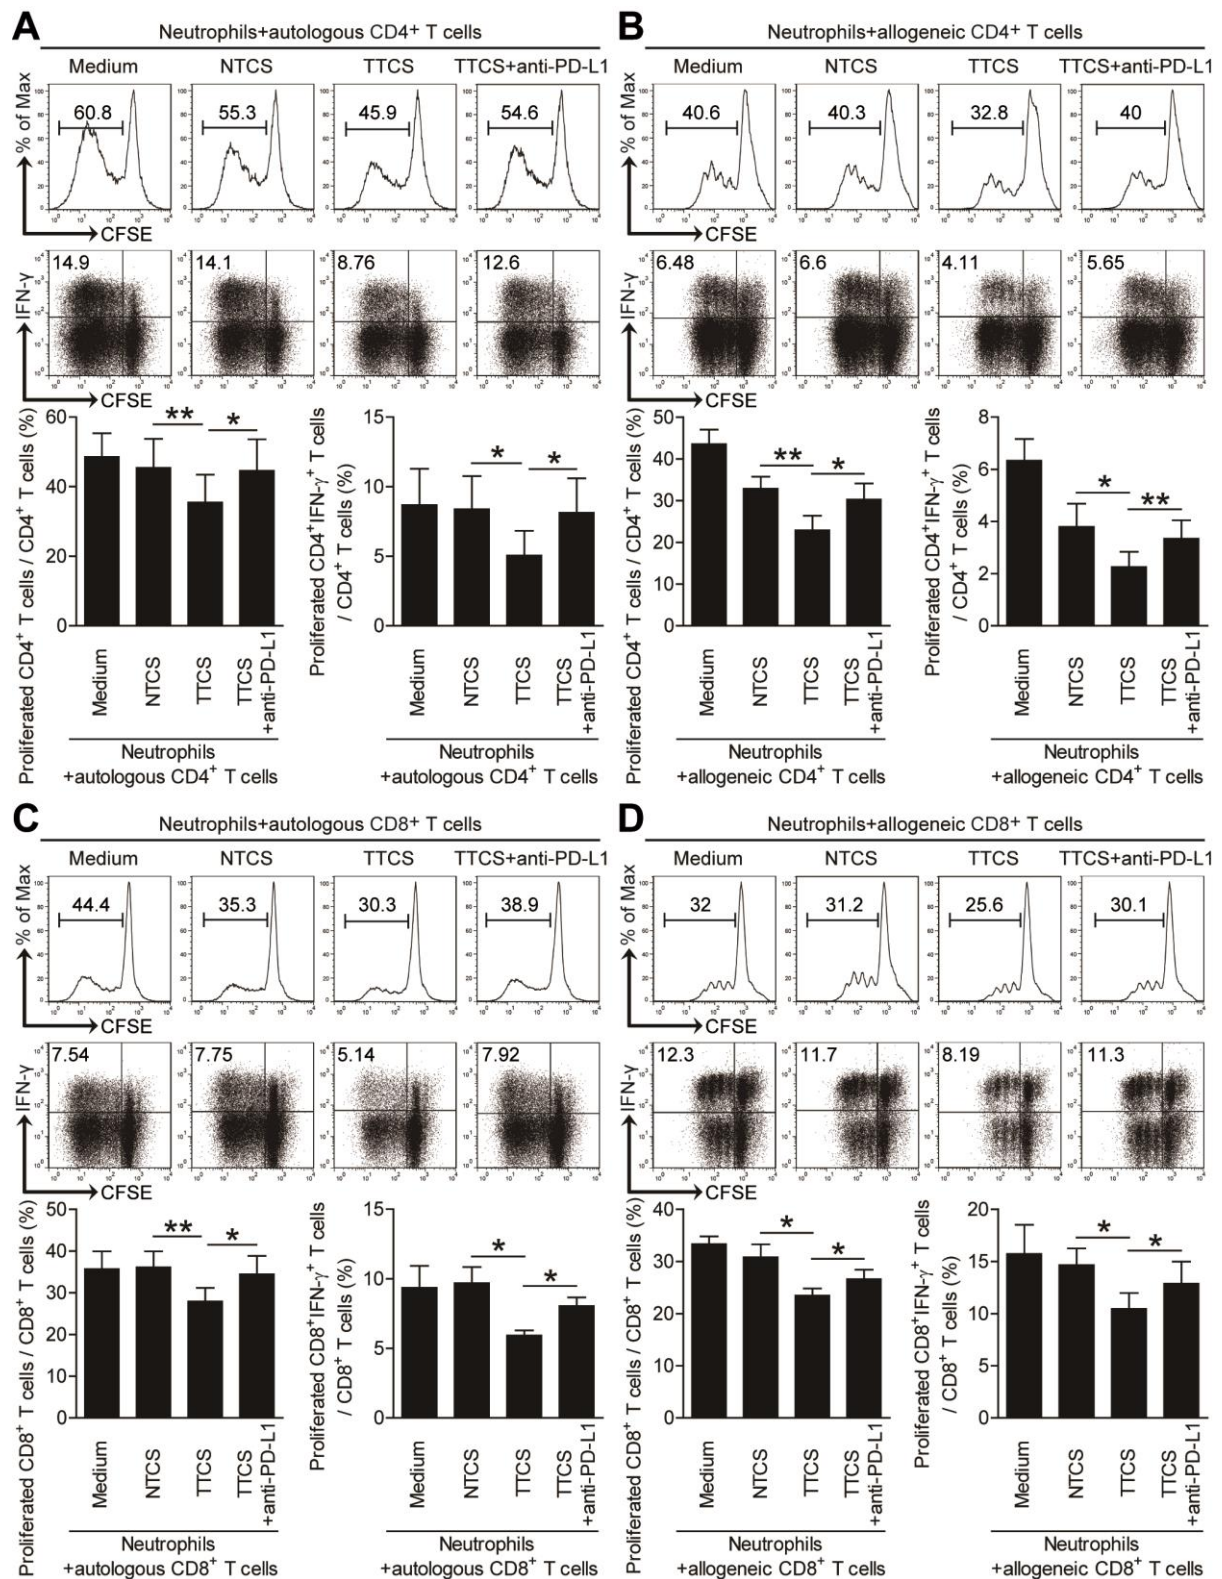

Supplementary Figure 5

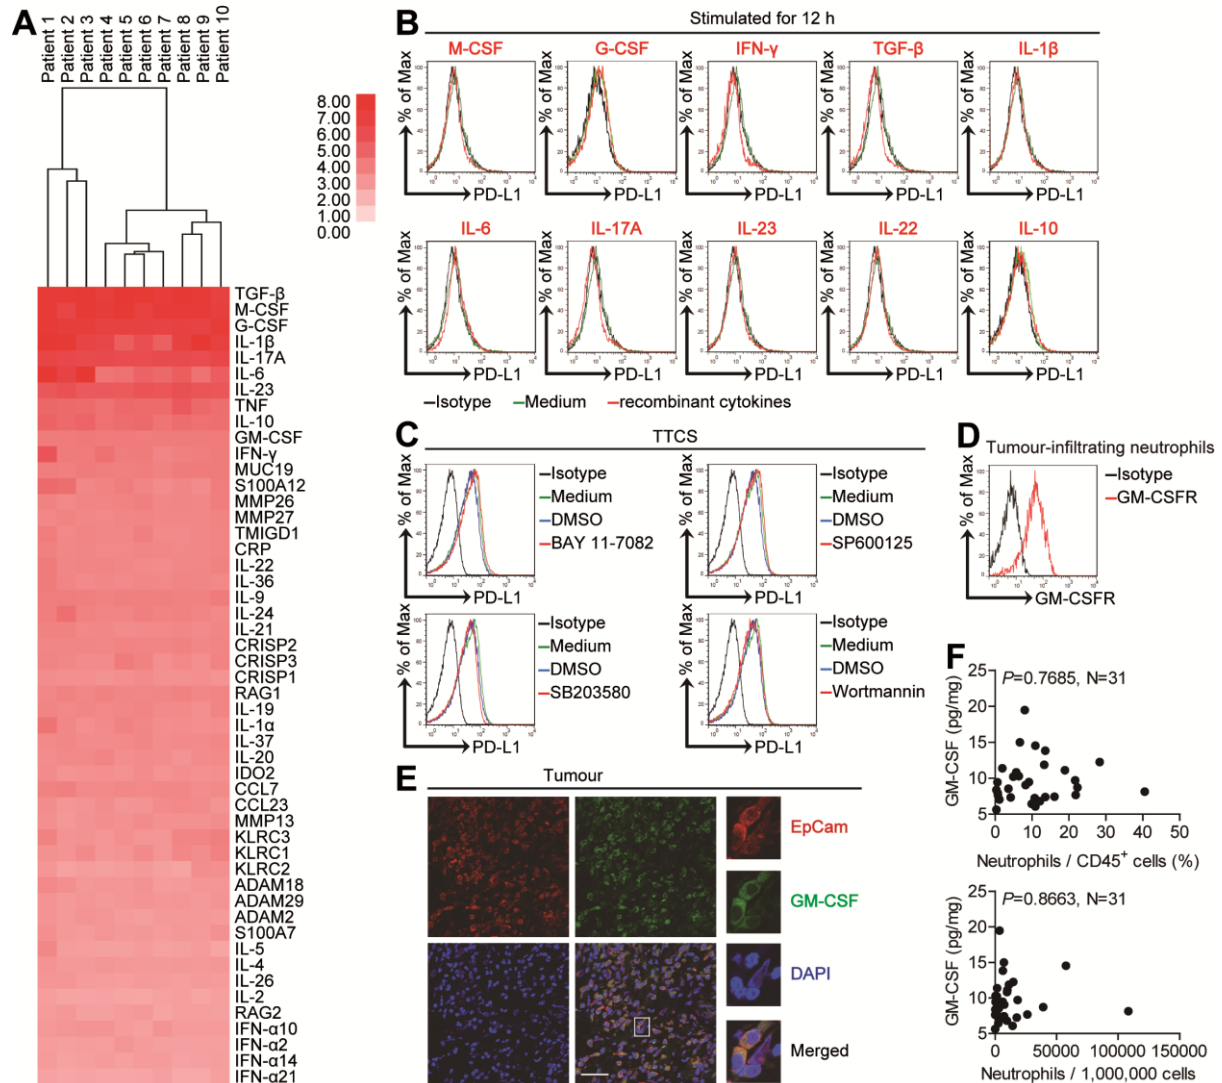

Supplementary Figure 6

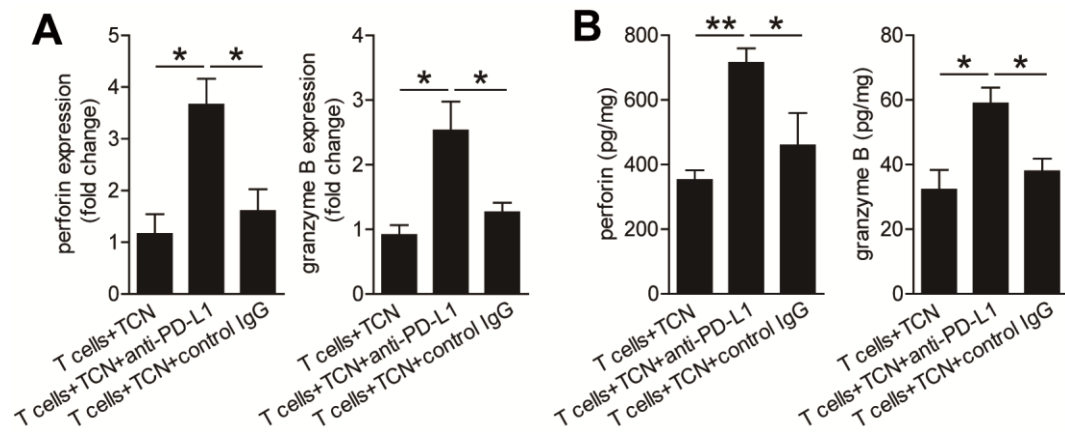

Supplementary Figure 7

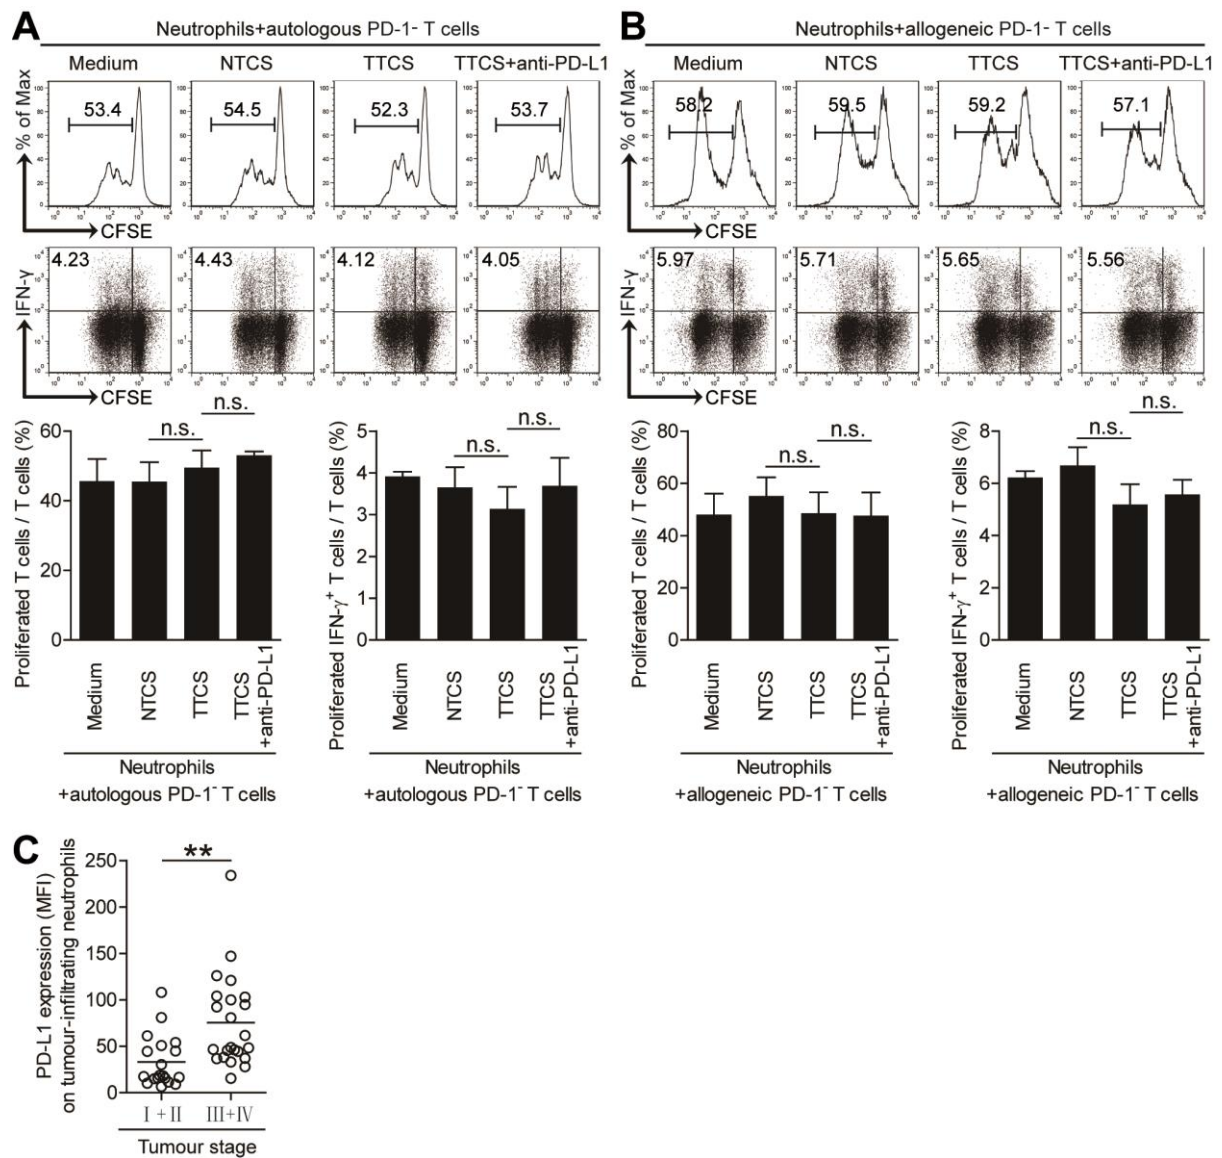

Supplement: gutjnl-2016-313075supp003.pdf [file gutjnl-2016-313075supp003.pdf]
