# Supplementary material for: Tumour-activated neutrophils in gastric cancer foster immune suppression and disease progression through GM-CSF-PD-L1 pathway
Source: PubMed Central journal article supplement — Gut. 2017 Mar 8;66(11):1900–11. doi: 10.1136/gutjnl-2016-313075 (PMC5739867; doi:10.1136/gutjnl-2016-313075), 2017-03-08
Supplement: gutjnl-2016-313075supp001.pdf [file gutjnl-2016-313075supp001.pdf]

**Supplementary Table 1.** Antibodies and other reagents

| Antibodies and reagents                             | Manufacturers             |
|-----------------------------------------------------|---------------------------|
| Antibodies for flow cytometry                       |                           |
| anti-CD45-PE-Cy7                                    | Biologend                 |
| anti-CD66b-FITC                                     | Biologend                 |
| anti-PD-L1-PE                                       | Biologend                 |
| anti-CD54-APC                                       | Biologend                 |
| anti-PD-1-PE                                        | Biologend                 |
| anti-HLA-DR-PerCP-Cy5.5                             | Biologend                 |
| anti-CD4-PerCP-Cy5.5                                | Biologend                 |
| anti-CD8-PerCP-Cy5.5                                | Biologend                 |
| anti-CD3-APC-H7                                     | BD Pharmingen             |
| anti-IFN- $\gamma$ -PE-Cy7                          | BD Pharmingen             |
| Antibodies for immunohistochemical staining         |                           |
| anti-CD15                                           | Dako                      |
| anti-CD3                                            | Dako                      |
| anti-proliferating cell nuclear antigen (PCNA)      | Santa Cruz                |
| horseradish peroxidase anti-rabbit IgG              | Zhongshan Biotechnology   |
| EnVision™ G2 System/AP Rabbit/Mouse (Permanent Red) | Dako                      |
| Antibodies for immunofluorescence                   |                           |
| rabbit anti-human anti-CD3                          | Abcam                     |
| mouse anti-human anti-CD15                          | Abcam                     |
| rabbit anti-human anti-EpCam                        | Abcam                     |
| mouse anti-human anti-GM-CSF                        | Abcam                     |
| goat anti-rabbit-TRITC                              | Zhongshan Biotechnology   |
| goat anti-mouse-FITC                                | Zhongshan Biotechnology   |
| Antibodies for neutralizing and blocking            |                           |
| anti-GM-CSF                                         | eBioscience               |
| anti-PD-L1                                          | R&D Systems               |
| Antibodies for western blot                         |                           |
| anti-STAT3                                          | Santa Cruz                |
| anti-p-STAT3 (Y705)                                 | Cell signaling technology |
| Purified anti-CD3 and anti-CD28 antibodies          | Biologend                 |
| ELISA kits                                          |                           |
| GM-CSF                                              | R&D Systems               |
| perforin                                            | Abcam                     |
| granzyme B                                          | eBioscience               |
| Reagents for signaling pathways inhibition          |                           |

|                                                        |                    |
|--------------------------------------------------------|--------------------|
| STAT3 phosphorylation inhibitor FLLL32                 | MedKoo Biosciences |
| JAK signaling inhibitor AG490                          | Merk Millipore     |
| IκBα inhibitor BAY 11-7082                             | Calbiochem         |
| JNK inhibitor SP600125                                 | Calbiochem         |
| MAPK inhibitor SB203580                                | Calbiochem         |
| PI3K inhibitor Wortmannin                              | Calbiochem         |
| arginase-1 inhibitor nor-NOHA                          | Santa Cruz         |
| induced nitric oxide synthase (iNOS) inhibitor 1400W   | Calbiochem         |
| Collagenase IV                                         | Sigma-Aldrich      |
| DNase I                                                | Sigma-Aldrich      |
| Phorbol myristate acetate                              | Sigma-Aldrich      |
| Ionomycin                                              | Sigma-Aldrich      |
| DMSO                                                   | Sigma-Aldrich      |
| Golgistop and Perm/Wash solution                       | BD Pharmingen      |
| Carboxylfluorescein succinimidyl ester (CFSE)          | eBioscience        |
| Protein Extraction Reagent                             | Pierce             |
| SuperSignal® West Dura Extended Duration Substrate kit | Thermo             |
| Fetal calf serum (FCS)                                 | Gibco              |
| RPMI-1640                                              | Hyclone            |
| Ficoll-Paque Plus                                      | GE Healthcare      |
| lyses solution                                         | TIANGEN            |
| All recombinant human cytokines and chemokines         | PeptoTech          |

---

APC-Cy7, allophycocyanin-cyanin 7; PE-Cy7, phycoerythrin-cyanin 7; FITC, Fluorescein isothiocyanate; PE, phycoerythrin; PerCP-Cy5.5, peridin chlorophyl protein-cyanin 5.5; APC, allophycocyanin; IL, interleukin; I IFN, interferon; PD-L1, programmed death-ligand 1; STAT3, signal transducer and activator of transcription 3; EpCam, epithelial cell adhesion molecule.

**Supplementary Table 2.** Clinical characteristics of 105 patients with gastric cancer

| Variables                                          | No. of patients  |
|----------------------------------------------------|------------------|
| Gender (male/female)                               | 80/25            |
| Age (years; median, range)                         | 56, 25-82        |
| <i>H.pylori</i> Ab (negative/positive)             | 27/78            |
| CEA (U/L; <5/≥5)                                   | 85/20            |
| Tumour size (cm; <5/≥5)                            | 65/40            |
| Lymphatic invasion (absent/present)                | 24/81            |
| Vascular invasion (absent/present)                 | 98/7             |
| Tumour (T) invasion (T1+T2/T3+T4)                  | 27/78            |
| Lymphoid Nodal (N) status (N0+N1/N2+N3)            | 50/55            |
| Distant metastasis (M) status (M0/M1)              | 97/8             |
| TNM stage ( I + II /III+IV)                        | 25/80            |
| Neutrophil percentage <sup>a</sup> (median, range) | 5.24, 0.241-54.9 |

<sup>a</sup>Neutrophil percentage was acquired on CD66b<sup>+</sup> cells in CD45<sup>+</sup> leukocytes that gated on CD45<sup>+</sup> leukocytes of tumour tissues. CEA, carcinoembryonic antigen; *H.pylori* Ab, *Helicobacter pylori* antibody.
